# Supplementary material for: Effective removal of lead(ii) from wastewater by amine-functionalized magnesium ferrite nanoparticles
Source: Royal Society of Chemistry journal article supplement (doi:10.1039/c6ra07680g), 2016-01-01
Supplement: c6ra07680g1.pdf [file c6ra07680g1.pdf]

## Electronic Supporting Information

### Effective removal of lead(II) from wastewater by amine-functionalized magnesium ferrite nanoparticles

Jeeranan Nonkumwong,<sup>a</sup> Supon Ananta,<sup>b</sup> Laongnuan Srisombat\*<sup>a</sup>

*<sup>a</sup>Department of Chemistry, Faculty of Science, Chiang Mai University, Chiang Mai 50200, Thailand*

*<sup>b</sup>Department of Physics and Materials Science, Faculty of Science, Chiang Mai University, Chiang Mai 50200, Thailand*

*\*e-mail: [slaongnuan@yahoo.com](mailto:slaongnuan@yahoo.com)*

## Calculations related to the adsorption.

### Adsorption capacity (q).

$$q = ((C_i - C_f) V) / m$$

where  $q$  is the amount of  $Pb^{2+}$  ions (mg) adsorbed onto unit mass of the adsorbent (g) in mg/g;  $C_i$  and  $C_f$  refer to the concentration of  $Pb^{2+}$  aqueous solution before and after adsorption, respectively, in mg/L;  $V$  is the volume of  $Pb^{2+}$  aqueous solution in L and  $m$  is the dry mass of the adsorbent in g.

### Removal efficiency.

The removal efficiency is defined as:

$$\text{removal efficiency (\%)} = ((C_i - C_f) / C_i) \times 100$$

### Pseudo-first-order kinetics.

The rate law is expressed below:

$$dq_t / dt = k_1 (q_e - q_t)$$

The integrated form then becomes:

$$\log (q_e - q_t) = \log (q_e) - k_1 t / 2.303$$

where  $q_e$  and  $q_t$  refer to the adsorption capacities at equilibrium and time  $t$ , respectively, in mg/g and  $k_1$  is the pseudo-first-order rate constant. Plotting the  $\log (q_e - q_t)$  against  $t$  provides the slope and the intercept as  $-k_1/2.303$  and  $\log (q_e)$ , respectively.

### Pseudo-second-order kinetics.

The rate law is expressed below:

$$dq_t / dt = k_2 (q_e - q_t)^2$$

The integrated form for the boundary conditions  $t = 0$  to  $t = t$  and  $q_t = 0$  to  $q_t = t$  with rearrangement into the linear form then becomes:

$$t / q_t = 1 / k_2 q_e^2 + (1 / q_e) t$$

where  $k_2$  is the pseudo-second-order rate constant. Plotting the  $t / q_t$  against  $t$  provides the slope and the intercept as  $(1 / q_e)$  and  $1 / k_2 q_e^2$ , respectively.

### **Langmuir isotherms.**

The equation for Langmuir isotherms model is defined as:

$$q_e = (q_m K_L C_e) / (1 + K_L C_e)$$

The linearized and rearranged form then becomes:

$$C_e / q_e = C_e (1 / q_m) + (1 / q_m K_L)$$

where  $q_m$  refers to the maximum adsorption capacity in mg/g or mmol/g;  $C_e$  is the equilibrium concentration of  $Pb^{2+}$  ions remained in the solution in mg/L and  $K_L$  is the Langmuir adsorption constant in L/mg or L/mmol. Plotting the  $C_e / q_e$  against  $C_e$  provides the slope and the intercept as  $(1 / q_m)$  and  $(1 / q_m K_L)$ , respectively.

### **Freundlich isotherms.**

The equation for Freundlich isotherms model is defined as:

$$q_e = K_F C_e^{1/n}$$

The logarithmic form then becomes:

$$\log q_e = 1/n (\log C_e) + \log K_F$$

where  $K_F$  is the Freundlich adsorption constant in  $mg^{1-(1/n)}L^{1/n}/g$  or  $mmol^{1-(1/n)}L^{1/n}/g$  and  $n$  represents the heterogeneity factor. Plotting the  $\log (q_e)$  against  $\log C_e$  provides the slope and the intercept as  $1/n$  and  $\log K_F$ , respectively.
